# Supplementary material for: Mercury species induced frequency-shift of molecular orientational transformation based on SERS
Source: Royal Society of Chemistry journal article supplement (doi:10.1039/c6an00945j), 2016-01-01
Supplement: c6an00945j1.pdf [file c6an00945j1.pdf]

**Supporting Information**

**Mercury Species Induced Frequency-Shift of Molecular Orientational  
Transformation Based on SERS**

Lei Chen<sup>†‡</sup>, Yue Zhao<sup>‡</sup>, Yaxin Wang<sup>‡</sup>, Yongjun Zhang<sup>†\*</sup>, Yang Liu<sup>‡</sup>, Xiao Xia Han<sup>§\*</sup>,  
Bing Zhao<sup>§</sup>, and Jinghai Yang<sup>‡</sup>

*†Key Laboratory of Preparation and Applications of Environmental Friendly Materials, Ministry of Education, College of Chemistry, Jilin Normal University, Siping 136000, P.R. China;*

*‡Key Laboratory of Functional Materials Physics and Chemistry, Ministry of Education, Jilin Normal University, Siping 136000, P.R. China;*

*§State Key Laboratory of Supramolecular Structure and Materials, Jilin University, Changchun 130012, P. R. China.*

\*To whom correspondence should be addressed. E-mail: [yjzhang@jlnu.edu.cn](mailto:yjzhang@jlnu.edu.cn);  
[hanxiaoxia@jlu.edu.cn](mailto:hanxiaoxia@jlu.edu.cn).

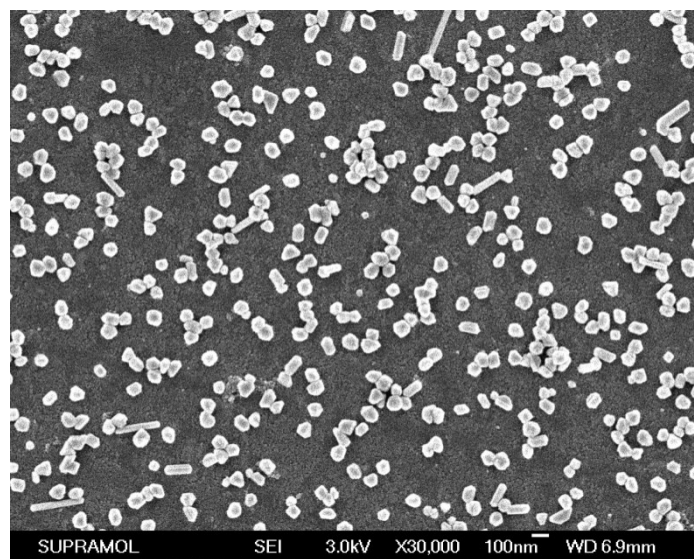

**SI\_Figure 1.** SEM image of self-assemble silver colloid film.

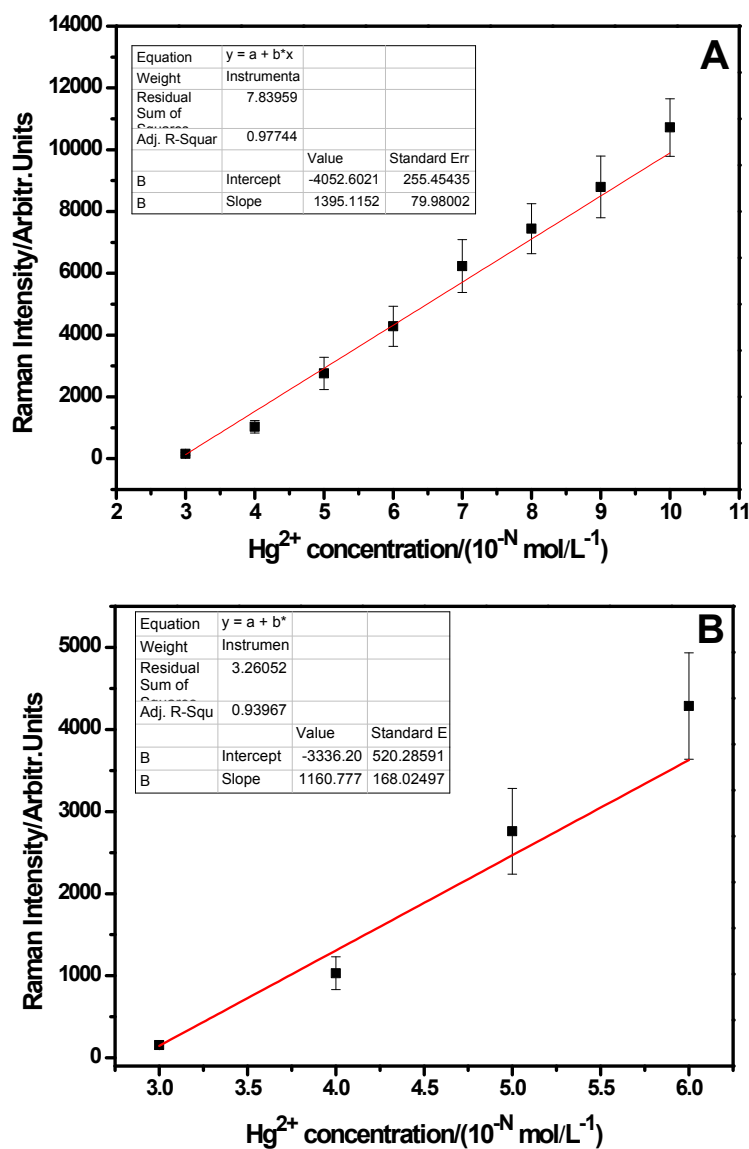

**SI\_Figure 2.** (A) Concentration-dependent SERS spectra of DASS with  $\text{Hg}^{2+}$  concentration range from  $10^{-3}$  to  $10^{-10}$  mol/L. The standard curve of the standard solution ( $\text{Hg}^{2+}$ ) obeys the equation  $Y = 1395.12X - 4052.60$ ,  $R^2 = 0.9774$ , where  $Y$  represents the SERS intensities of the band at  $1375 \sim 1389 \text{ cm}^{-1}$  of DASS, and  $X$  is the concentration of  $\text{Hg}^{2+}$ . (B) Concentration-dependent SERS spectra of DASS with  $\text{Hg}^{2+}$  concentration range from  $10^{-3}$  to  $10^{-6}$  mol/L. The standard curve of the standard solution ( $\text{Hg}^{2+}$ ) obeys the equation  $Y = 1160.78X - 3336.20$ ,  $R^2 = 0.9397$ , where  $Y$  represents the SERS intensities of the band at  $1378 \sim 1389 \text{ cm}^{-1}$  of DASS, and  $X$  is the concentration of  $\text{Hg}^{2+}$ .

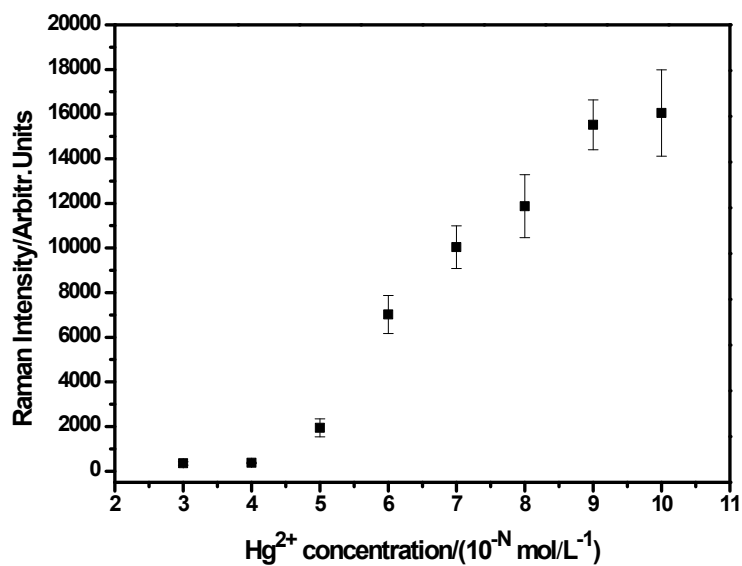

SI\_Figure 3. (A) Concentration-dependent SERS spectra of DASS (band at 565 cm<sup>-1</sup>) with Hg<sup>2+</sup> concentration range from 10<sup>-3</sup> to 10<sup>-10</sup> mol/L.

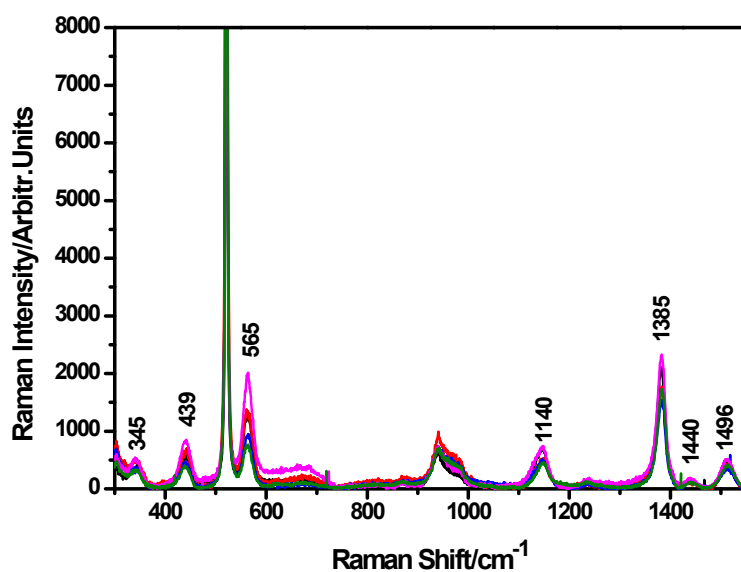

SI\_Figure 4. SERS spectra of DASS in the presence of the mercury ions at a concentration of 10<sup>-4</sup> mol/L on five different chips. The DASS-modified silver nanoparticles used as a sensor chip indeed provided rather irreproducible SERS intensity due to irreproducible distribution of hot spot and possible aggregation of nanoparticles.

**SI\_Table 1.** Mean wavenumbers ( $\text{cm}^{-1}$ ) of the Raman and SERS spectra of DASS.

| Raman ( $\text{cm}^{-1}$ ) | SERS( $\text{cm}^{-1}$ ) | Assignment                                                    |
|----------------------------|--------------------------|---------------------------------------------------------------|
| 334                        | 345                      | $\delta(\text{S}=\text{CS})$                                  |
| 438                        | 439                      | $\delta(\text{CH}_3\text{NC}), \nu(\text{C}=\text{S})$        |
| 572                        | 565                      | $\nu(\text{CSS})$                                             |
| 878                        | 876                      | $\nu(\text{CH}_3\text{N})$                                    |
| 961                        | 947                      | $\nu(\text{CH}_3\text{N}), \nu(\text{C}=\text{S})$            |
| 1121                       | 1140                     | $\rho(\text{CH}_3), \nu(\text{CN})$                           |
| 1367                       | 1374~1389                | $\delta_s(\text{CH}_3), \nu(\text{CN})$                       |
| 1440                       | 1440                     | $\delta_{\text{as}}(\text{CH}_3), \nu(\text{CN})$             |
| 1493                       | 1496                     | $\nu(\text{CN}), \delta(\text{CH}_3),$<br>$\rho(\text{CH}_3)$ |

$\nu$ =stretching,  $\delta$ = deformation,  $\rho$ = rocking

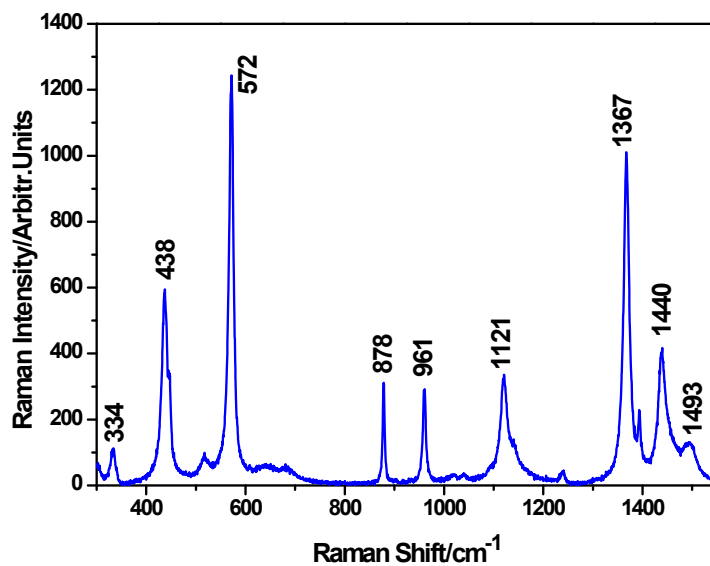

**SI\_Figure 5.** Raman spectrum of DASS powder.
